# Erratum to: A Hybrid Machine Learning Approach for Performance Modeling of Cloud-Based Big Data Applications

EHSAN ATAIE<sup>1,2,\*</sup>, ATHANASIA EVANGELINO<sup>3</sup>, EUGENIO GIANNITI<sup>3</sup> AND  
DANILO ARDAGNA<sup>3</sup>

<sup>1</sup>*Department of Computer Engineering, University of Mazandaran, Babolsar, Iran*

<sup>2</sup>*Distributed Computing Systems Research Group, University of Mazandaran, Babolsar, Iran*

<sup>3</sup>*Dipartimento di Elettronica, Informazione e Bioingegneria, Politecnico di Milano, Milan, Italy*

\*Corresponding author: [ataie@umz.ac.ir](mailto:ataie@umz.ac.ir)

*Received 31 December 2019; Revised 30 June 2021; Accepted 05 August 2021*

Handling editor: Iain Stewart

---

*The Computer Journal*, doi: <https://doi.org/10.1093/comjnl/bxab131>

In the originally published version of this manuscript, Danilo Ardagna was incorrectly listed as corresponding author. The corresponding author has been corrected to Ehsan Ataie: [ataie@umz.ac.ir](mailto:ataie@umz.ac.ir).
